# Supplementary material
Source: publisher site journal article supplement (https://www.spandidos-publications.com/1724/downloadSupplementary)
Supplement: Supplementary file 1 [file downloadSupplementary]

## Sheet: singleGene
Table SI. mRNA expression of EMP1 in BLAC patients from TCGA.
ID	EMP1	Type
TCGA-BT-A20R-11	6.9252	Normal
TCGA-GD-A3OP-11	6.71141	Normal
TCGA-BT-A20U-11	6.91481	Normal
TCGA-K4-A3WV-11	6.55615	Normal
TCGA-CU-A0YN-11	6.58675	Normal
TCGA-BL-A13J-11	6.71536	Normal
TCGA-K4-A54R-11	6.96999	Normal
TCGA-BT-A20N-11	6.67204	Normal
TCGA-GD-A3OQ-11	6.46469	Normal
TCGA-BT-A2LB-11	7.06848	Normal
TCGA-BT-A20W-11	6.58096	Normal
TCGA-CU-A0YR-11	6.67338	Normal
TCGA-BT-A2LA-11	6.78204	Normal
TCGA-K4-A5RI-11	6.70382	Normal
TCGA-GC-A3WC-11	6.60457	Normal
TCGA-GC-A6I3-11	6.46959	Normal
TCGA-GD-A2C5-11	6.61077	Normal
TCGA-BT-A20Q-11	6.63931	Normal
TCGA-GC-A3BM-11	6.88989	Normal
TCGA-DK-AA6S-01	6.4221	Tumor
TCGA-DK-A6B2-01	6.5344	Tumor
TCGA-GU-A763-01	6.18957	Tumor
TCGA-XF-A9T4-01	6.75907	Tumor
TCGA-FD-A5C1-01	6.50991	Tumor
TCGA-GU-A42Q-01	6.51285	Tumor
TCGA-DK-A3IL-01	6.17777	Tumor
TCGA-XF-AAMH-01	6.47073	Tumor
TCGA-FT-A61P-01	6.51636	Tumor
TCGA-G2-A2EF-01	6.37599	Tumor
TCGA-XF-A9T2-01	6.49654	Tumor
TCGA-C4-A0F7-01	6.53747	Tumor
TCGA-G2-A2EK-01	6.26462	Tumor
TCGA-FD-A6TB-01	6.52902	Tumor
TCGA-UY-A9PD-01	6.31243	Tumor
TCGA-DK-AA6P-01	6.08908	Tumor
TCGA-GV-A3QK-01	6.42171	Tumor
TCGA-GC-A3I6-01	6.65565	Tumor
TCGA-UY-A8OC-01	6.61874	Tumor
TCGA-FD-A3B7-01	6.56767	Tumor
TCGA-ZF-A9R1-01	6.45053	Tumor
TCGA-ZF-A9RF-01	6.1953	Tumor
TCGA-4Z-AA7Q-01	6.31522	Tumor
TCGA-E7-A519-01	5.81482	Tumor
TCGA-G2-A3VY-01	6.30273	Tumor
TCGA-C4-A0EZ-01	6.25663	Tumor
TCGA-XF-A9SY-01	6.50308	Tumor
TCGA-FD-A43U-01	6.3083	Tumor
TCGA-4Z-AA7S-01	6.43166	Tumor
TCGA-DK-AA75-01	6.25615	Tumor
TCGA-XF-AAML-01	6.10637	Tumor
TCGA-DK-A6B5-01	6.61131	Tumor
TCGA-KQ-A41R-01	6.37144	Tumor
TCGA-4Z-AA87-01	5.92355	Tumor
TCGA-FD-A6TE-01	6.1806	Tumor
TCGA-YC-A9TC-01	6.31159	Tumor
TCGA-BT-A2LA-01	6.08301	Tumor
TCGA-FD-A3NA-01	6.28437	Tumor
TCGA-BT-A42F-01	6.45211	Tumor
TCGA-ZF-AA5P-01	6.53741	Tumor
TCGA-2F-A9KW-01	6.45709	Tumor
TCGA-4Z-AA80-01	6.30016	Tumor
TCGA-XF-A8HD-01	6.47282	Tumor
TCGA-2F-A9KT-01	6.52376	Tumor
TCGA-E7-A677-01	6.1444	Tumor
TCGA-SY-A9G0-01	6.56857	Tumor
TCGA-YF-AA3M-01	6.5648	Tumor
TCGA-CU-A0YR-01	6.45209	Tumor
TCGA-K4-A83P-01	6.50159	Tumor
TCGA-ZF-A9RL-01	6.44264	Tumor
TCGA-FD-A43S-01	6.34875	Tumor
TCGA-GV-A3QH-01	6.00758	Tumor
TCGA-4Z-AA84-01	6.39407	Tumor
TCGA-K4-A4AC-01	6.45071	Tumor
TCGA-K4-A6MB-01	6.46158	Tumor
TCGA-S5-A6DX-01	6.10204	Tumor
TCGA-GU-A766-01	6.43654	Tumor
TCGA-HQ-A5ND-01	6.73147	Tumor
TCGA-E7-A7XN-01	6.59761	Tumor
TCGA-XF-AAMW-01	6.55109	Tumor
TCGA-GC-A4ZW-01	6.21964	Tumor
TCGA-G2-AA3B-01	5.94324	Tumor
TCGA-DK-A2HX-01	6.74328	Tumor
TCGA-GC-A3RB-01	6.46316	Tumor
TCGA-GV-A40E-01	6.44127	Tumor
TCGA-FJ-A3ZF-01	6.12467	Tumor
TCGA-XF-A9SU-01	6.32507	Tumor
TCGA-ZF-A9R9-01	6.3657	Tumor
TCGA-DK-A2I2-01	6.50361	Tumor
TCGA-FD-A3SQ-01	6.38155	Tumor
TCGA-XF-A9SH-01	6.45876	Tumor
TCGA-XF-A8HC-01	6.4723	Tumor
TCGA-K4-A5RI-01	6.54474	Tumor
TCGA-BT-A20W-01	6.33308	Tumor
TCGA-CU-A3YL-01	6.37984	Tumor
TCGA-DK-A1AD-01	6.22022	Tumor
TCGA-XF-A9T8-01	6.83353	Tumor
TCGA-C4-A0F6-01	6.4283	Tumor
TCGA-DK-AA6U-01	6.19643	Tumor
TCGA-CF-A9FM-01	6.23937	Tumor
TCGA-E7-A7DU-01	6.42273	Tumor
TCGA-UY-A9PA-01	6.67566	Tumor
TCGA-FD-A3SJ-01	6.24818	Tumor
TCGA-CF-A47X-01	6.16824	Tumor
TCGA-GV-A40G-01	6.46354	Tumor
TCGA-2F-A9KO-01	6.4449	Tumor
TCGA-HQ-A2OF-01	6.2237	Tumor
TCGA-DK-AA71-01	6.33737	Tumor
TCGA-UY-A9PH-01	6.4214	Tumor
TCGA-XF-A8HF-01	6.44073	Tumor
TCGA-CF-A5UA-01	6.57693	Tumor
TCGA-XF-A9T3-01	6.50029	Tumor
TCGA-XF-A9SL-01	6.48954	Tumor
TCGA-CF-A47W-01	6.07299	Tumor
TCGA-GC-A3RD-01	6.50449	Tumor
TCGA-HQ-A5NE-01	6.75843	Tumor
TCGA-FD-A3N5-01	6.46415	Tumor
TCGA-E7-A3Y1-01	6.11412	Tumor
TCGA-4Z-AA81-01	6.75449	Tumor
TCGA-G2-A2EC-01	6.44718	Tumor
TCGA-K4-A5RJ-01	6.21817	Tumor
TCGA-CF-A5U8-01	6.17164	Tumor
TCGA-K4-A3WS-01	6.43088	Tumor
TCGA-XF-A9SW-01	6.54006	Tumor
TCGA-DK-AA6W-01	6.40416	Tumor
TCGA-DK-A3IS-01	6.4232	Tumor
TCGA-GV-A3QG-01	6.43698	Tumor
TCGA-G2-A2EO-01	6.43912	Tumor
TCGA-XF-A9T0-01	6.31279	Tumor
TCGA-FD-A5BU-01	6.54477	Tumor
TCGA-GV-A3JX-01	6.26626	Tumor
TCGA-FD-A62S-01	6.64002	Tumor
TCGA-BT-A2LB-01	6.55493	Tumor
TCGA-FD-A6TI-01	6.71528	Tumor
TCGA-XF-AAMJ-01	6.47645	Tumor
TCGA-XF-A9SZ-01	6.35794	Tumor
TCGA-CF-A9FL-01	6.26845	Tumor
TCGA-ZF-A9RD-01	6.64985	Tumor
TCGA-GD-A3OS-01	6.12326	Tumor
TCGA-K4-A54R-01	6.46301	Tumor
TCGA-FT-A3EE-01	6.57045	Tumor
TCGA-FD-A43P-01	6.22807	Tumor
TCGA-XF-A9SJ-01	6.47851	Tumor
TCGA-K4-A5RH-01	6.4828	Tumor
TCGA-R3-A69X-01	6.39752	Tumor
TCGA-UY-A78K-01	6.55504	Tumor
TCGA-CU-A3QU-01	6.36773	Tumor
TCGA-FD-A3B8-01	6.51117	Tumor
TCGA-DK-A3IV-01	6.30052	Tumor
TCGA-GU-A762-01	6.63164	Tumor
TCGA-XF-AAMX-01	6.19924	Tumor
TCGA-CF-A1HS-01	6.52599	Tumor
TCGA-GU-A42R-01	6.31785	Tumor
TCGA-YC-A8S6-01	6.77368	Tumor
TCGA-ZF-AA4W-01	6.51551	Tumor
TCGA-BT-A42E-01	6.33305	Tumor
TCGA-E7-A7PW-01	6.16627	Tumor
TCGA-BT-A20U-01	6.77369	Tumor
TCGA-GU-A764-01	6.53845	Tumor
TCGA-ZF-AA4R-01	6.57398	Tumor
TCGA-CF-A8HX-01	6.45058	Tumor
TCGA-E5-A4U1-01	6.05266	Tumor
TCGA-FD-A3SN-01	6.67901	Tumor
TCGA-4Z-AA86-01	6.52454	Tumor
TCGA-CF-A47V-01	6.30444	Tumor
TCGA-FD-A5BR-01	6.53412	Tumor
TCGA-GV-A3QF-01	6.4581	Tumor
TCGA-XF-AAN4-01	6.55982	Tumor
TCGA-XF-A9ST-01	6.23562	Tumor
TCGA-GV-A6ZA-01	6.15056	Tumor
TCGA-PQ-A6FN-01	6.53507	Tumor
TCGA-XF-A9T6-01	6.46679	Tumor
TCGA-CF-A3MG-01	6.52812	Tumor
TCGA-ZF-A9RE-01	6.70403	Tumor
TCGA-DK-A1A5-01	6.45792	Tumor
TCGA-ZF-AA56-01	6.65547	Tumor
TCGA-GU-A767-01	6.51141	Tumor
TCGA-GC-A3WC-01	6.49299	Tumor
TCGA-4Z-AA7N-01	6.62619	Tumor
TCGA-H4-A2HO-01	6.28581	Tumor
TCGA-XF-AAMZ-01	6.34495	Tumor
TCGA-2F-A9KQ-01	6.39627	Tumor
TCGA-4Z-AA7M-01	6.24885	Tumor
TCGA-FD-A62O-01	6.31316	Tumor
TCGA-FD-A3B5-01	6.59464	Tumor
TCGA-ZF-A9RM-01	6.21687	Tumor
TCGA-FJ-A871-01	6.6047	Tumor
TCGA-XF-AAMT-01	6.48565	Tumor
TCGA-FD-A6TD-01	6.44395	Tumor
TCGA-UY-A78L-01	6.40643	Tumor
TCGA-ZF-AA4V-01	6.5166	Tumor
TCGA-ZF-A9R7-01	6.19399	Tumor
TCGA-GV-A3QI-01	6.20924	Tumor
TCGA-XF-A8HH-01	6.512	Tumor
TCGA-GC-A3YS-01	6.46478	Tumor
TCGA-CU-A5W6-01	6.21858	Tumor
TCGA-BL-A3JM-01	6.28836	Tumor
TCGA-E5-A2PC-01	6.6179	Tumor
TCGA-FD-A5C0-01	6.49349	Tumor
TCGA-CF-A9FF-01	6.40028	Tumor
TCGA-FD-A62P-01	6.83258	Tumor
TCGA-G2-A3IB-01	6.8672	Tumor
TCGA-XF-AAME-01	6.48449	Tumor
TCGA-FD-A43N-01	6.4824	Tumor
TCGA-GC-A3BM-01	6.44628	Tumor
TCGA-E7-A4IJ-01	6.24172	Tumor
TCGA-FD-A43Y-01	6.47785	Tumor
TCGA-GV-A3JV-01	6.5449	Tumor
TCGA-FD-A3SL-01	6.55938	Tumor
TCGA-XF-AAMG-01	6.26806	Tumor
TCGA-E7-A6ME-01	6.00047	Tumor
TCGA-BT-A20R-01	6.72525	Tumor
TCGA-UY-A8OD-01	6.33129	Tumor
TCGA-FD-A6TH-01	6.59556	Tumor
TCGA-2F-A9KR-01	6.50028	Tumor
TCGA-BT-A20O-01	6.43666	Tumor
TCGA-LT-A5Z6-01	6.25097	Tumor
TCGA-ZF-A9RC-01	6.2783	Tumor
TCGA-BT-A20N-01	6.55104	Tumor
TCGA-DK-A3WX-01	6.6093	Tumor
TCGA-CU-A0YN-01	6.73022	Tumor
TCGA-CF-A9FH-01	6.27316	Tumor
TCGA-FD-A3SP-01	6.50145	Tumor
TCGA-GU-AATP-01	6.30944	Tumor
TCGA-FD-A5BT-01	6.50643	Tumor
TCGA-CF-A3MI-01	6.41169	Tumor
TCGA-LT-A8JT-01	6.34025	Tumor
TCGA-CF-A47T-01	6.32744	Tumor
TCGA-FJ-A3Z9-01	6.35739	Tumor
TCGA-DK-A6AW-01	6.71294	Tumor
TCGA-E7-A97P-01	6.60129	Tumor
TCGA-E7-A6MF-01	6.36506	Tumor
TCGA-S5-AA26-01	6.46693	Tumor
TCGA-ZF-AA52-01	6.58354	Tumor
TCGA-CU-A3KJ-01	6.585	Tumor
TCGA-DK-AA76-01	6.49689	Tumor
TCGA-CF-A1HR-01	6.41259	Tumor
TCGA-DK-A6B1-01	6.52882	Tumor
TCGA-CF-A47Y-01	6.1626	Tumor
TCGA-4Z-AA82-01	6.62086	Tumor
TCGA-GC-A3RC-01	6.41487	Tumor
TCGA-E7-A678-01	6.15863	Tumor
TCGA-UY-A9PB-01	6.43904	Tumor
TCGA-ZF-AA5H-01	6.66256	Tumor
TCGA-KQ-A41O-01	6.26534	Tumor
TCGA-MV-A51V-01	6.55391	Tumor
TCGA-BT-A0S7-01	6.63918	Tumor
TCGA-XF-A8HI-01	6.40494	Tumor
TCGA-2F-A9KP-01	6.60448	Tumor
TCGA-CF-A8HY-01	6.33994	Tumor
TCGA-E7-A3X6-01	6.51982	Tumor
TCGA-DK-AA6Q-01	6.59025	Tumor
TCGA-FD-A3B4-01	6.49194	Tumor
TCGA-E7-A97Q-01	6.36047	Tumor
TCGA-K4-AAQO-01	6.46629	Tumor
TCGA-DK-A3X1-01	6.39135	Tumor
TCGA-DK-A3IK-01	6.29494	Tumor
TCGA-DK-AA6M-01	6.39453	Tumor
TCGA-DK-A3IT-01	6.39717	Tumor
TCGA-C4-A0F1-01	6.503	Tumor
TCGA-FD-A5BZ-01	6.54441	Tumor
TCGA-ZF-AA53-01	6.41953	Tumor
TCGA-YC-A89H-01	6.53906	Tumor
TCGA-UY-A9PE-01	6.16975	Tumor
TCGA-BT-A3PK-01	6.85083	Tumor
TCGA-GU-A42P-01	6.23372	Tumor
TCGA-KQ-A41Q-01	6.12189	Tumor
TCGA-SY-A9G5-01	6.51745	Tumor
TCGA-UY-A78P-01	6.64574	Tumor
TCGA-UY-A78O-01	6.29932	Tumor
TCGA-DK-A3WW-01	6.58508	Tumor
TCGA-G2-AA3D-01	6.23808	Tumor
TCGA-ZF-A9R5-01	5.95347	Tumor
TCGA-KQ-A41P-01	6.47524	Tumor
TCGA-DK-A1AG-01	6.23049	Tumor
TCGA-ZF-A9R2-01	6.59377	Tumor
TCGA-DK-A1AC-01	6.27862	Tumor
TCGA-BT-A20P-01	6.13199	Tumor
TCGA-XF-AAMY-01	6.30388	Tumor
TCGA-K4-A4AB-01	6.55521	Tumor
TCGA-BT-A3PH-01	6.52741	Tumor
TCGA-BT-A3PJ-01	6.56264	Tumor
TCGA-FD-A43X-01	6.04112	Tumor
TCGA-4Z-AA83-01	6.39905	Tumor
TCGA-DK-AA6T-01	6.08911	Tumor
TCGA-E7-A8O8-01	6.29084	Tumor
TCGA-FD-A3B6-01	6.67127	Tumor
TCGA-E7-A7DV-01	6.55755	Tumor
TCGA-ZF-AA5N-01	6.92459	Tumor
TCGA-CU-A72E-01	6.63023	Tumor
TCGA-GU-AATO-01	6.50559	Tumor
TCGA-GD-A3OP-01	6.51196	Tumor
TCGA-XF-AAN5-01	6.8219	Tumor
TCGA-XF-A8HG-01	6.55959	Tumor
TCGA-E7-A5KE-01	6.28378	Tumor
TCGA-XF-AAN3-01	6.69584	Tumor
TCGA-GD-A3OQ-01	6.72525	Tumor
TCGA-DK-A1AE-01	6.30081	Tumor
TCGA-GV-A3JW-01	6.26769	Tumor
TCGA-FD-A3SM-01	6.41257	Tumor
TCGA-GU-AATQ-01	6.51985	Tumor
TCGA-CF-A47S-01	6.19187	Tumor
TCGA-XF-A8HB-01	6.57298	Tumor
TCGA-XF-AAMQ-01	6.39229	Tumor
TCGA-DK-A1A7-01	6.43776	Tumor
TCGA-DK-AA77-01	6.43348	Tumor
TCGA-E7-A6MD-01	6.35011	Tumor
TCGA-FD-A3SR-01	6.37971	Tumor
TCGA-BL-A0C8-01	6.45258	Tumor
TCGA-ZF-A9RN-01	6.17664	Tumor
TCGA-CF-A3MH-01	6.55641	Tumor
TCGA-XF-A9SP-01	6.39917	Tumor
TCGA-G2-AA3F-01	6.33653	Tumor
TCGA-4Z-AA7W-01	6.37164	Tumor
TCGA-GC-A6I1-01	6.44465	Tumor
TCGA-GV-A3JZ-01	6.1961	Tumor
TCGA-DK-A1AA-01	6.47599	Tumor
TCGA-E7-A541-01	6.33979	Tumor
TCGA-DK-A6AV-01	6.55277	Tumor
TCGA-E7-A5KF-01	6.20952	Tumor
TCGA-GD-A2C5-01	6.31162	Tumor
TCGA-YF-AA3L-01	6.18396	Tumor
TCGA-DK-AA74-01	6.43735	Tumor
TCGA-FD-A3N6-01	6.42323	Tumor
TCGA-DK-AA6R-01	6.67626	Tumor
TCGA-4Z-AA89-01	6.24215	Tumor
TCGA-BT-A20X-01	6.68777	Tumor
TCGA-DK-A1AB-01	6.66809	Tumor
TCGA-DK-A3IU-01	6.33926	Tumor
TCGA-C4-A0F0-01	6.72581	Tumor
TCGA-GC-A6I3-01	6.14077	Tumor
TCGA-XF-A9SV-01	6.49811	Tumor
TCGA-FD-A62N-01	6.41842	Tumor
TCGA-FD-A6TA-01	6.49237	Tumor
TCGA-DK-A3WY-01	6.32077	Tumor
TCGA-XF-AAMR-01	6.37568	Tumor
TCGA-FD-A6TF-01	6.86059	Tumor
TCGA-CF-A3MF-01	6.2802	Tumor
TCGA-5N-A9KI-01	6.59049	Tumor
TCGA-ZF-AA4X-01	6.54976	Tumor
TCGA-E5-A4TZ-01	6.6487	Tumor
TCGA-BL-A13J-01	6.54566	Tumor
TCGA-DK-A1A6-01	6.24993	Tumor
TCGA-ZF-A9R0-01	6.19035	Tumor
TCGA-ZF-AA51-01	6.36038	Tumor
TCGA-G2-A2ES-01	6.7797	Tumor
TCGA-CU-A0YO-01	6.59905	Tumor
TCGA-GC-A3OO-01	6.58774	Tumor
TCGA-DK-A6B6-01	6.3056	Tumor
TCGA-BT-A20T-01	6.31195	Tumor
TCGA-K4-A6FZ-01	6.56119	Tumor
TCGA-G2-A2EJ-01	6.85946	Tumor
TCGA-DK-A2I6-01	6.45971	Tumor
TCGA-XF-A8HE-01	6.72546	Tumor
TCGA-XF-A9SI-01	6.36971	Tumor
TCGA-XF-A9T5-01	6.30847	Tumor
TCGA-XF-AAN7-01	6.64584	Tumor
TCGA-DK-A2I1-01	6.46686	Tumor
TCGA-BT-A0YX-01	6.78772	Tumor
TCGA-DK-A1AF-01	6.66501	Tumor
TCGA-XF-A9SX-01	6.45275	Tumor
TCGA-UY-A9PF-01	6.62591	Tumor
TCGA-K4-A3WV-01	6.35867	Tumor
TCGA-E7-A8O7-01	6.33349	Tumor
TCGA-FD-A5BY-01	6.53299	Tumor
TCGA-BT-A20V-01	6.5412	Tumor
TCGA-ZF-AA4U-01	6.21321	Tumor
TCGA-PQ-A6FI-01	6.52074	Tumor
TCGA-FJ-A3Z7-01	6.69399	Tumor
TCGA-DK-A3IM-01	6.69764	Tumor
TCGA-ZF-AA4T-01	6.39903	Tumor
TCGA-G2-A2EL-01	5.95041	Tumor
TCGA-FD-A5BS-01	6.45567	Tumor
TCGA-FD-A6TC-01	6.43438	Tumor
TCGA-DK-A3X2-01	6.58721	Tumor
TCGA-UY-A78N-01	6.31141	Tumor
TCGA-FD-A3SS-01	6.6565	Tumor
TCGA-4Z-AA7R-01	6.36284	Tumor
TCGA-DK-A1A3-01	6.40363	Tumor
TCGA-E7-A85H-01	6.31523	Tumor
TCGA-DK-AA6X-01	6.2993	Tumor
TCGA-CF-A27C-01	6.38481	Tumor
TCGA-KQ-A41N-01	6.3269	Tumor
TCGA-XF-A9SK-01	6.4512	Tumor
TCGA-ZF-A9R4-01	6.32393	Tumor
TCGA-FJ-A3ZE-01	6.36237	Tumor
TCGA-GD-A76B-01	6.29723	Tumor
TCGA-G2-A3IE-01	6.10396	Tumor
TCGA-BT-A20Q-01	6.38101	Tumor
TCGA-XF-A9SM-01	6.41572	Tumor
TCGA-FD-A5BX-01	6.72188	Tumor
TCGA-DK-A2I4-01	6.55822	Tumor
TCGA-FD-A3B3-01	6.69416	Tumor
TCGA-H4-A2HQ-01	6.39002	Tumor
TCGA-4Z-AA7Y-01	6.50705	Tumor
TCGA-FD-A5BV-01	6.522	Tumor
TCGA-ZF-A9R3-01	6.22124	Tumor
TCGA-UY-A78M-01	6.42758	Tumor
TCGA-BT-A20J-01	6.39359	Tumor
TCGA-GD-A6C6-01	5.90743	Tumor
TCGA-XF-AAN2-01	6.60956	Tumor
TCGA-4Z-AA7O-01	6.49453	Tumor
TCGA-DK-AA6L-01	6.50913	Tumor
TCGA-XF-AAN1-01	6.15613	Tumor
TCGA-BT-A42C-01	6.34647	Tumor
TCGA-ZF-AA54-01	6.67388	Tumor
TCGA-K4-A3WU-01	6.37414	Tumor
TCGA-ZF-AA58-01	6.45107	Tumor
TCGA-ZF-AA4N-01	6.55513	Tumor
TCGA-BL-A5ZZ-01	6.62179	Tumor
TCGA-CF-A7I0-01	6.39149	Tumor
TCGA-DK-A3IN-01	6.41781	Tumor
TCGA-DK-A6B0-01	6.25897	Tumor
TCGA-XF-AAN0-01	6.70443	Tumor
TCGA-E7-A4XJ-01	6.39729	Tumor
TCGA-G2-AA3C-01	6.64202	Tumor
TCGA-HQ-A2OE-01	6.3234	Tumor
TCGA-5N-A9KM-01	6.29111	Tumor
TCGA-FD-A6TK-01	6.52165	Tumor
TCGA-UY-A8OB-01	6.33949	Tumor
TCGA-DK-A3IQ-01	6.54882	Tumor
TCGA-FD-A6TG-01	6.36314	Tumor
TCGA-KQ-A41S-01	6.60907	Tumor
TCGA-LC-A66R-01	6.73757	Tumor
TCGA-BL-A13I-01	6.56456	Tumor
TCGA-FD-A3SO-01	6.39396	Tumor
TCGA-BT-A2LD-01	6.43564	Tumor
